# Supplementary material for: Preparation of glycopeptide-modified pH-sensitive liposomes for promoting antigen cross-presentation and induction of antigen-specific cellular immunity
Source: Royal Society of Chemistry journal article supplement (doi:10.1039/d3bm01746j), 2024-01-01
Supplement: d3bm01746j1.pdf [file d3bm01746j1.pdf]

## Supplementary Information

### Preparation of glycopeptide-modified pH-sensitive liposomes for promoting antigen cross-presentation and induction of antigen-specific cellular immunity

Eiji Yuba<sup>1\*</sup> and Rajesh Kumar Gupta<sup>2\*</sup>

<sup>1</sup>Department of Applied Chemistry, Graduate School of Engineering, Osaka Metropolitan University, 1-1 Gakuen-cho, Naka-ku, Sakai, Osaka 5998531, Japan

<sup>2</sup>Protein Biochemistry Research Centre, Dr. D. Y. Patil Biotechnology and Bioinformatics Institute, Dr. D. Y. Patil Vidyapeeth, Tathawade, Pune 411033, Maharashtra, India

\*Correspondence: yuba@omu.ac.jp and rajeshkumar.gupta@dpu.edu.in

Tel.: +81-72-247-6016; Fax: +81-72-254-9330

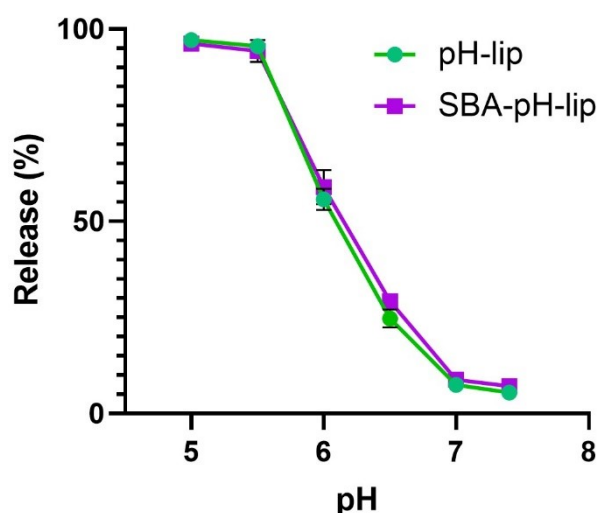

**Figure S1.** pH-Dependence of pyranine release after 30 min incubation at 37 °C from egg PC liposomes modified with or without SBA and/or pH-sensitive polysaccharide derivative (MGlu58-Dex-C10). Each point is the mean  $\pm$  SEM ( $n = 3$ ).

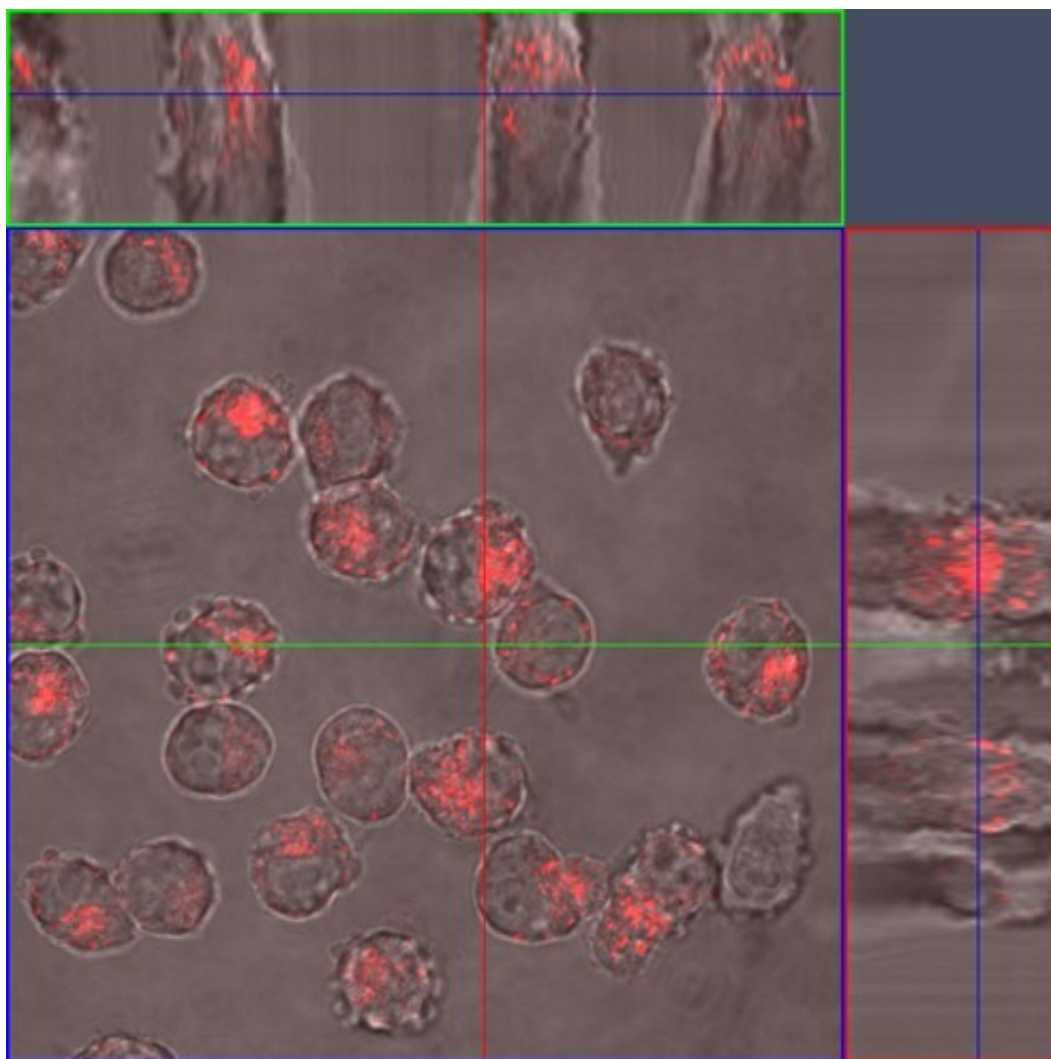

**Figure S2.** Z-stacked image of DC2.4 cells treated with SBA-pH-lip to confirm internalization of liposomes. DC2.4 cells were incubated in the presence of liposomes (0.3 mM lipids) for 5 h at 37 °C.

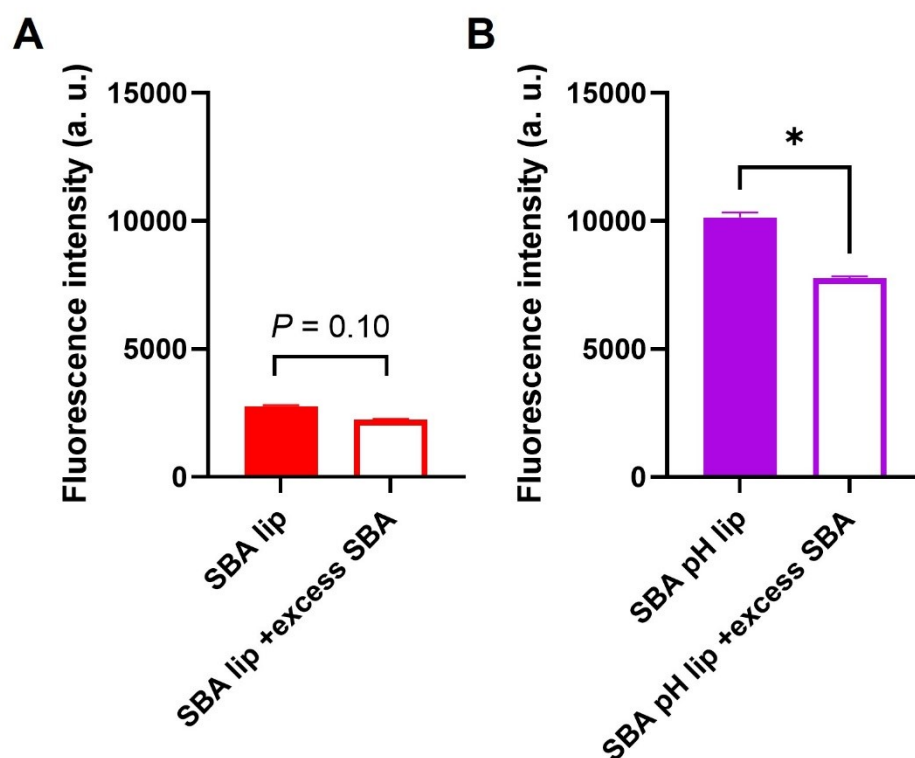

**Figure S3.** Effect of excess SBA for the cellular association of the liposomes. DiI-labeled SBA-lip (A) or SBA-pH-lip (B) were incubated with DC2.4 cells (lipid concentration: 0.3 mM) in the presence or absence of free SBA (1 mg/mL) for 4 h. Relative fluorescence intensity of DC2.4 cells were measured by a flow cytometry. Fluorescence intensity for untreated cells was subtracted. Statistical analyses were done using Student's *t*-test.  $*P < 0.05$ .

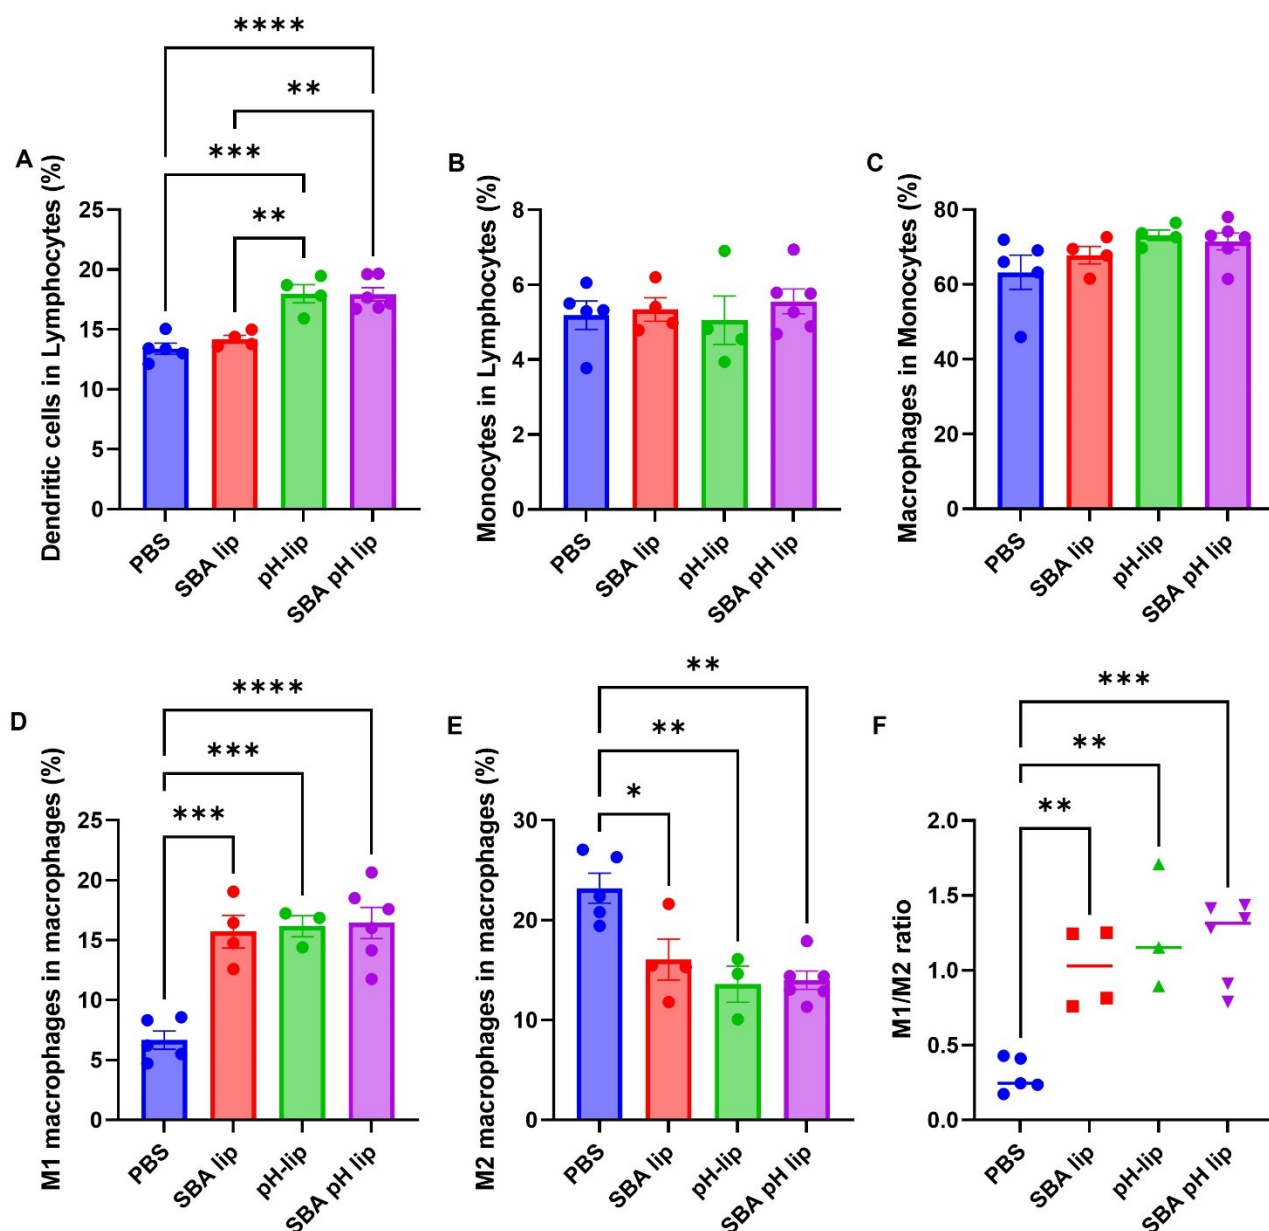

**Figure S4.** Effect of subcutaneous injection of liposomes on immune cell populations in the spleen. Mice were injected subcutaneously with PBS or liposomes on days 7 and 14. Single cells were extracted from the spleen on day 15, followed by flow cytometric analysis. Graphs depict the frequency of (A) CD11c<sup>+</sup> dendritic cells within CD45<sup>+</sup> lymphocytes, (B) CD11b<sup>+</sup> monocytes within CD45<sup>+</sup> lymphocytes, (C) F4/80<sup>+</sup> macrophages within CD11b<sup>+</sup> CD45<sup>+</sup> monocytes. (D) MHC-II<sup>+</sup> M1 macrophage within macrophages, (E) CD206<sup>+</sup> M2 macrophage within macrophages and (F) M1/M2 ratio of macrophages. (mean  $\pm$  SEM;  $n = 3-6$ ) Statistical analyses were done using ANOVA with Tukey's test: \* $P < 0.05$ , \*\* $P < 0.01$ , \*\*\* $P < 0.001$  and \*\*\*\* $P < 0.0001$ .

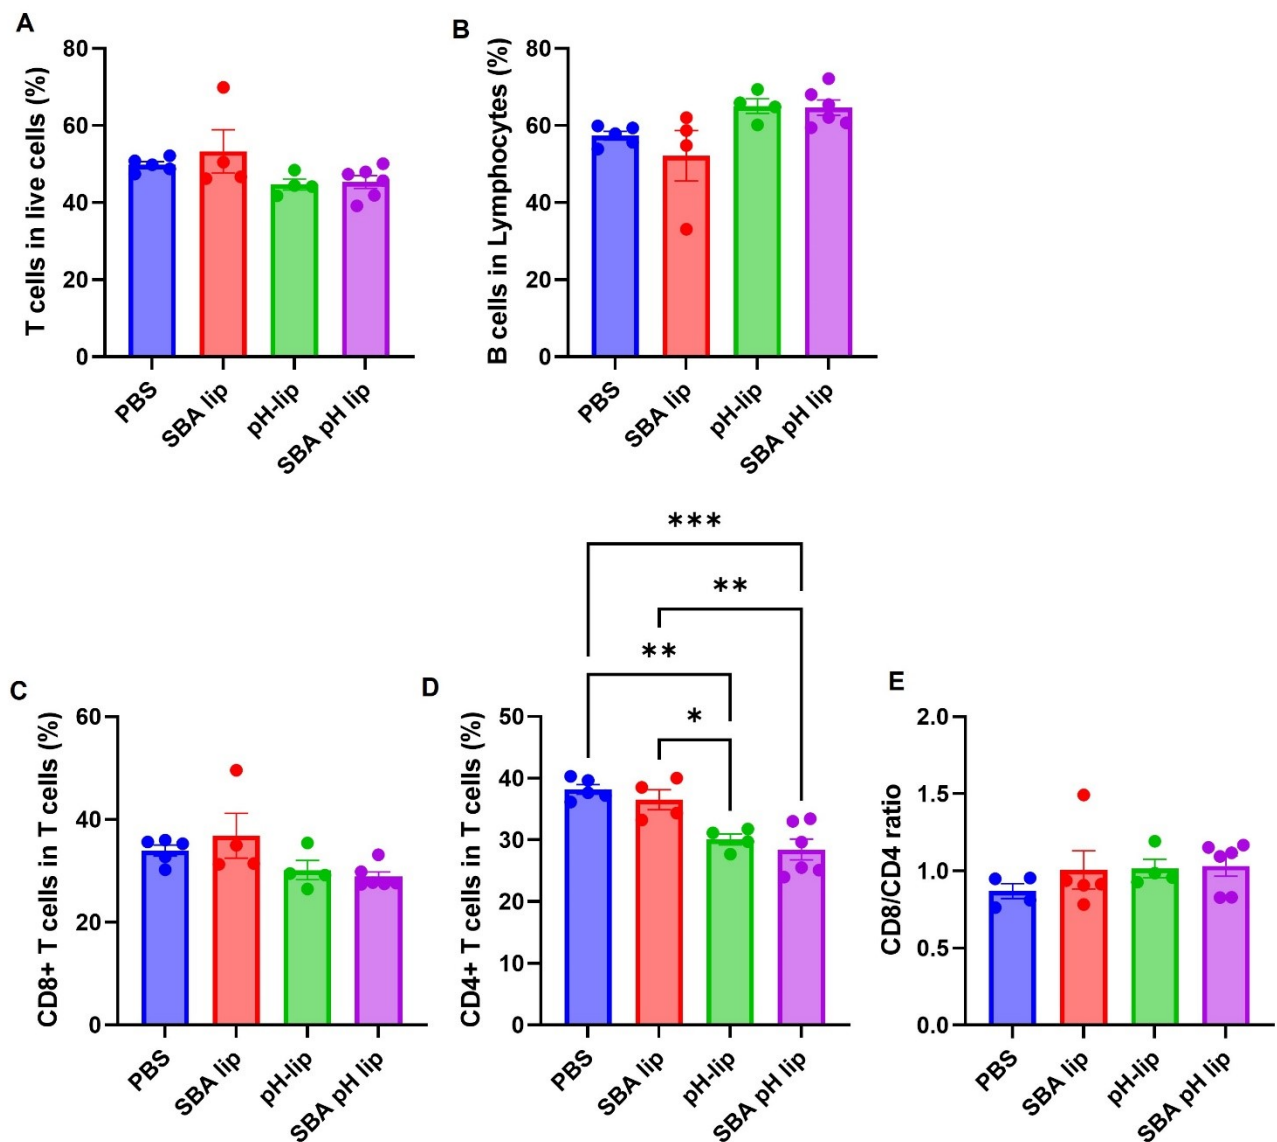

**Figure S5.** Effect of subcutaneous injection of liposomes on immune cell populations in the spleen. Mice were injected subcutaneously with PBS or liposomes on days 7 and 14. Single cells were extracted from the spleen on day 15, followed by flow cytometric analysis. Graphs depict the frequency of (A) CD3+ T cells within live cells, (B) B220+ B cells within CD45+ lymphocytes, (C) CD8+ T cells within CD3+ cells, (D) CD4+ T cells within CD3+ cells, and (E) CD8/CD4 ratios. (mean  $\pm$  SEM;  $n = 4-6$ ) Statistical analyses were done using ANOVA with Tukey's test: \* $P < 0.05$ , \*\* $P < 0.01$  and \*\*\* $P < 0.001$ .

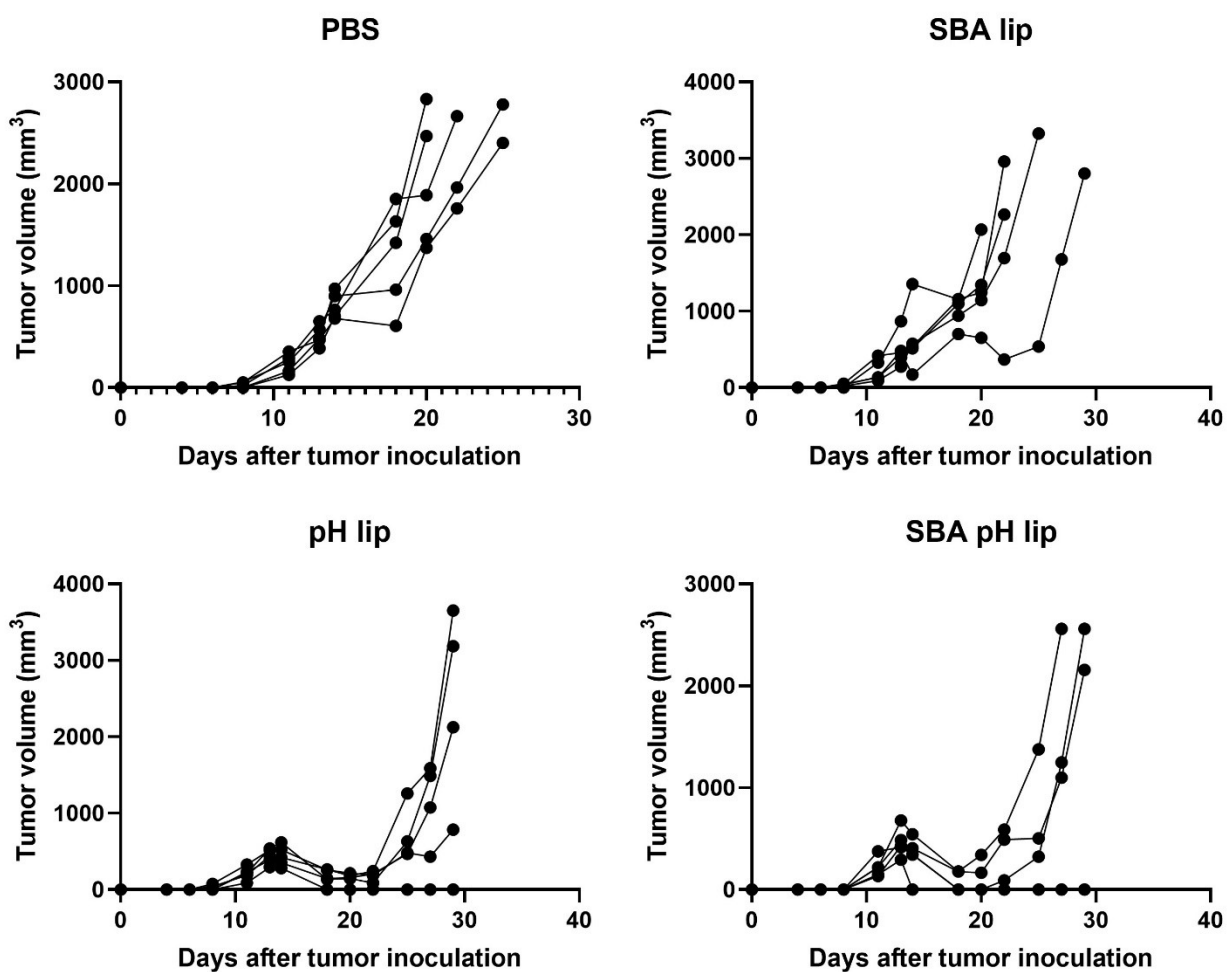

**Figure S6.** Individual tumor volume changes for Figure 8.

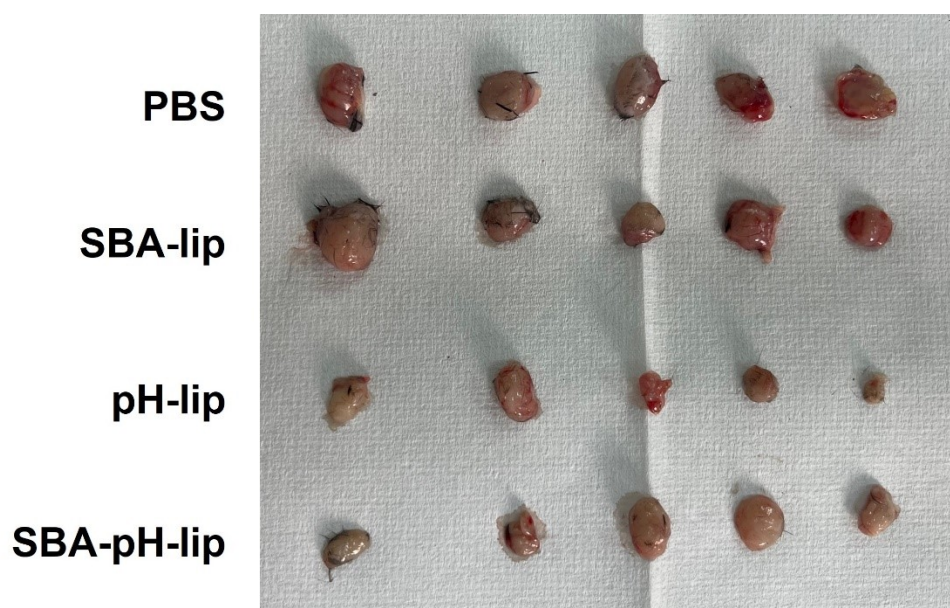

**Figure S7.** Images for excised tumor from tumor-bearing mice on Day 13. PBS or OVA-loaded liposomes were subcutaneously injected to the mice on Day 7.

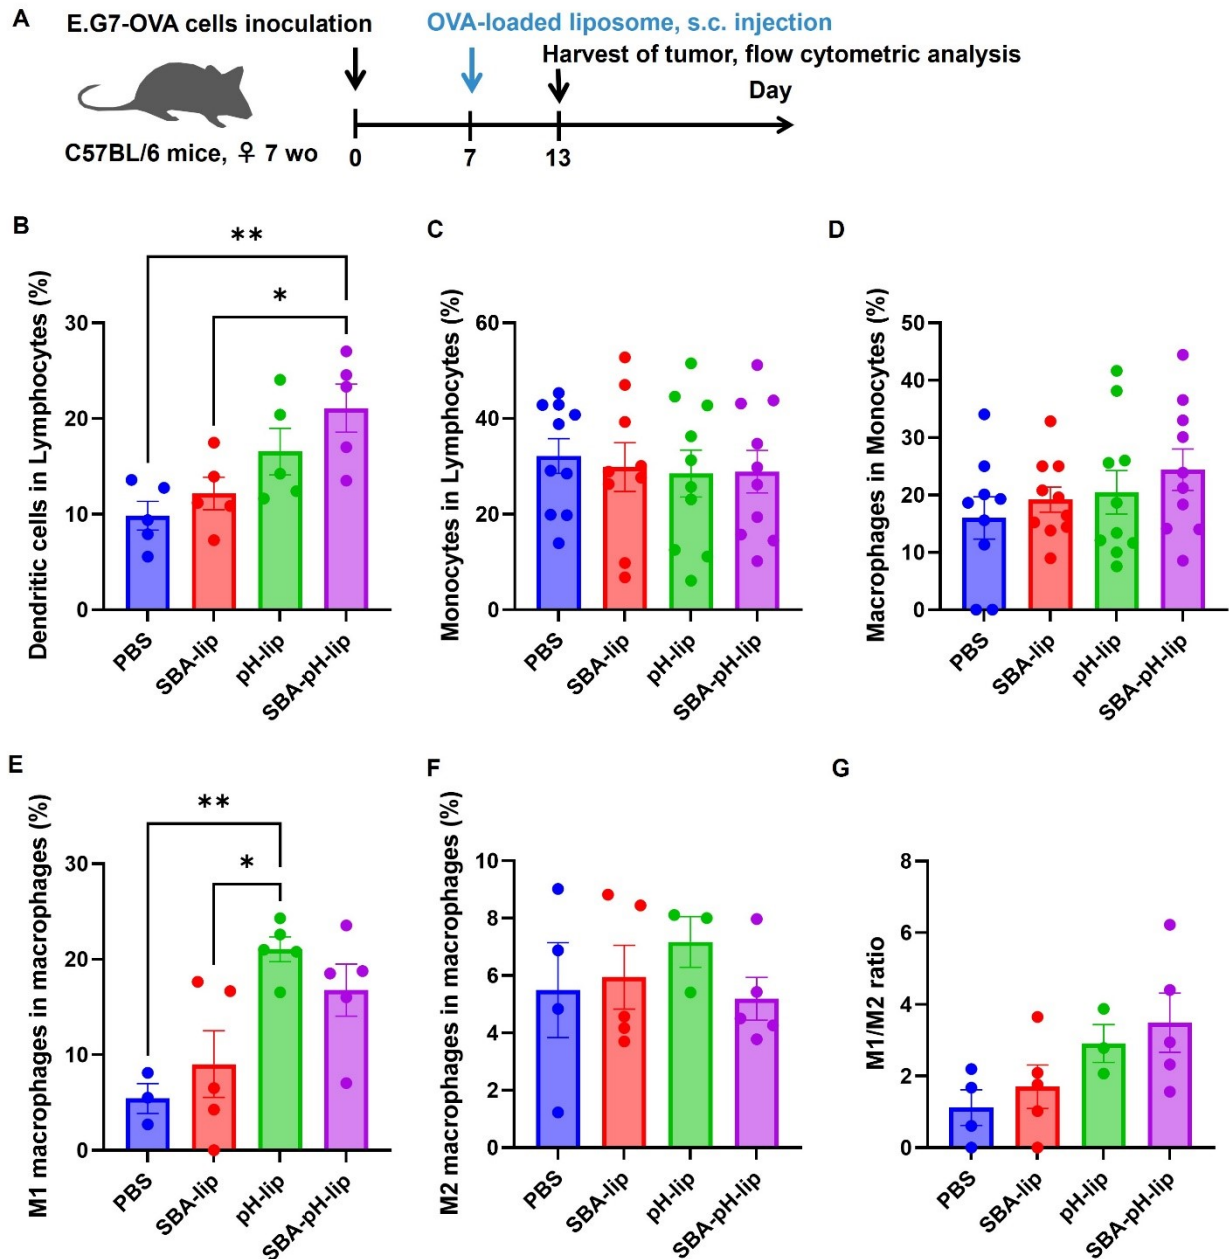

**Figure S8.** Effect of subcutaneous injection of liposomes on immune cell populations in the tumor. (A) Experimental schedule. E.G7-OVA ( $5 \times 10^5$ /mouse) were subcutaneously inoculated into the left backs of C57BL/6 mice and tumor volume on day 0. Mice were subcutaneously injected 50 mg of OVA on day 7 with OVA-loaded liposomes. Single cells were extracted from the tumor on day 13, followed by flow cytometric analysis. Graphs depict the frequency of (B) CD11c<sup>+</sup> dendritic cells within CD45<sup>+</sup> lymphocytes, (C) CD11b<sup>+</sup> monocytes within CD45<sup>+</sup> lymphocytes, (D) F4/80<sup>+</sup> macrophages within CD11b<sup>+</sup> CD45<sup>+</sup> monocytes. (E) MHC-II<sup>+</sup> M1 macrophage within macrophages, (F) CD206<sup>+</sup> M2 macrophage within macrophages and (G) M1/M2 ratio of macrophages. (mean  $\pm$  SEM;  $n = 3-10$ ) Statistical analyses were done using ANOVA with Tukey's test \* $P < 0.05$  and \*\* $P < 0.01$ .

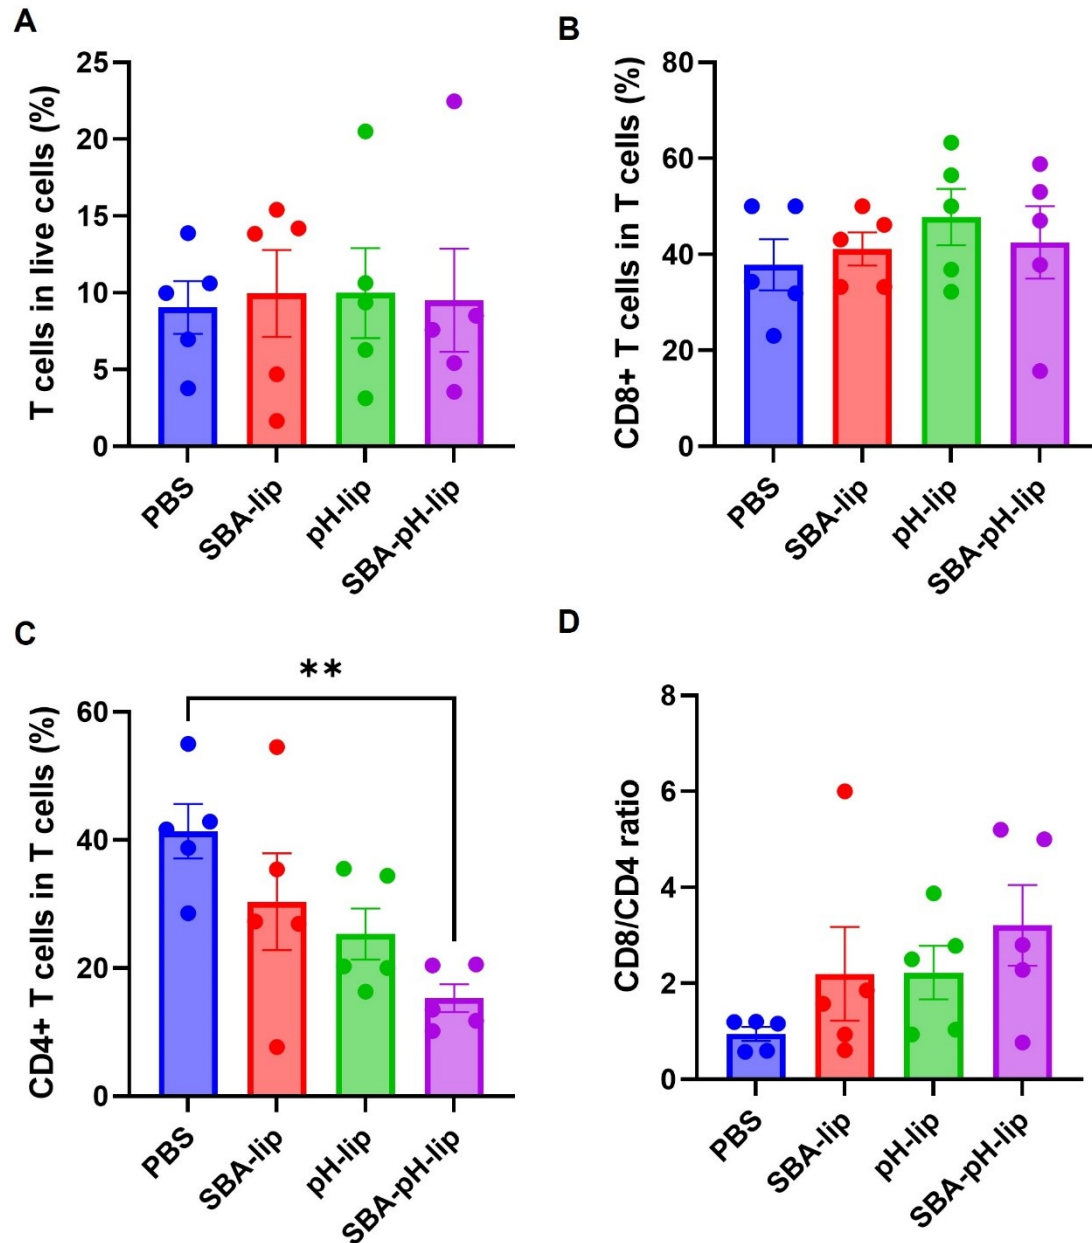

**Figure S9.** Effect of subcutaneous injection of liposomes on immune cell populations in the tumor. E.G7-OVA ( $5 \times 10^5$ /mouse) were subcutaneously inoculated into the left backs of C57BL/6 mice and tumor volume on day 0. Mice were subcutaneously injected 50 mg of OVA on day 7 with OVA-loaded liposomes. Single cells were extracted from the tumor on day 13, followed by flow cytometric analysis. Graphs depict the frequency of (A) CD3+ T cells within live cells, (B) CD8+ T cells within CD3+ cells, (C) CD4+ T cells within CD3+ cells, and (D) CD8/CD4 ratios. (mean  $\pm$  SEM;  $n = 5$ ) Statistical analyses were done using ANOVA with Tukey's test.  $**P < 0.01$ .

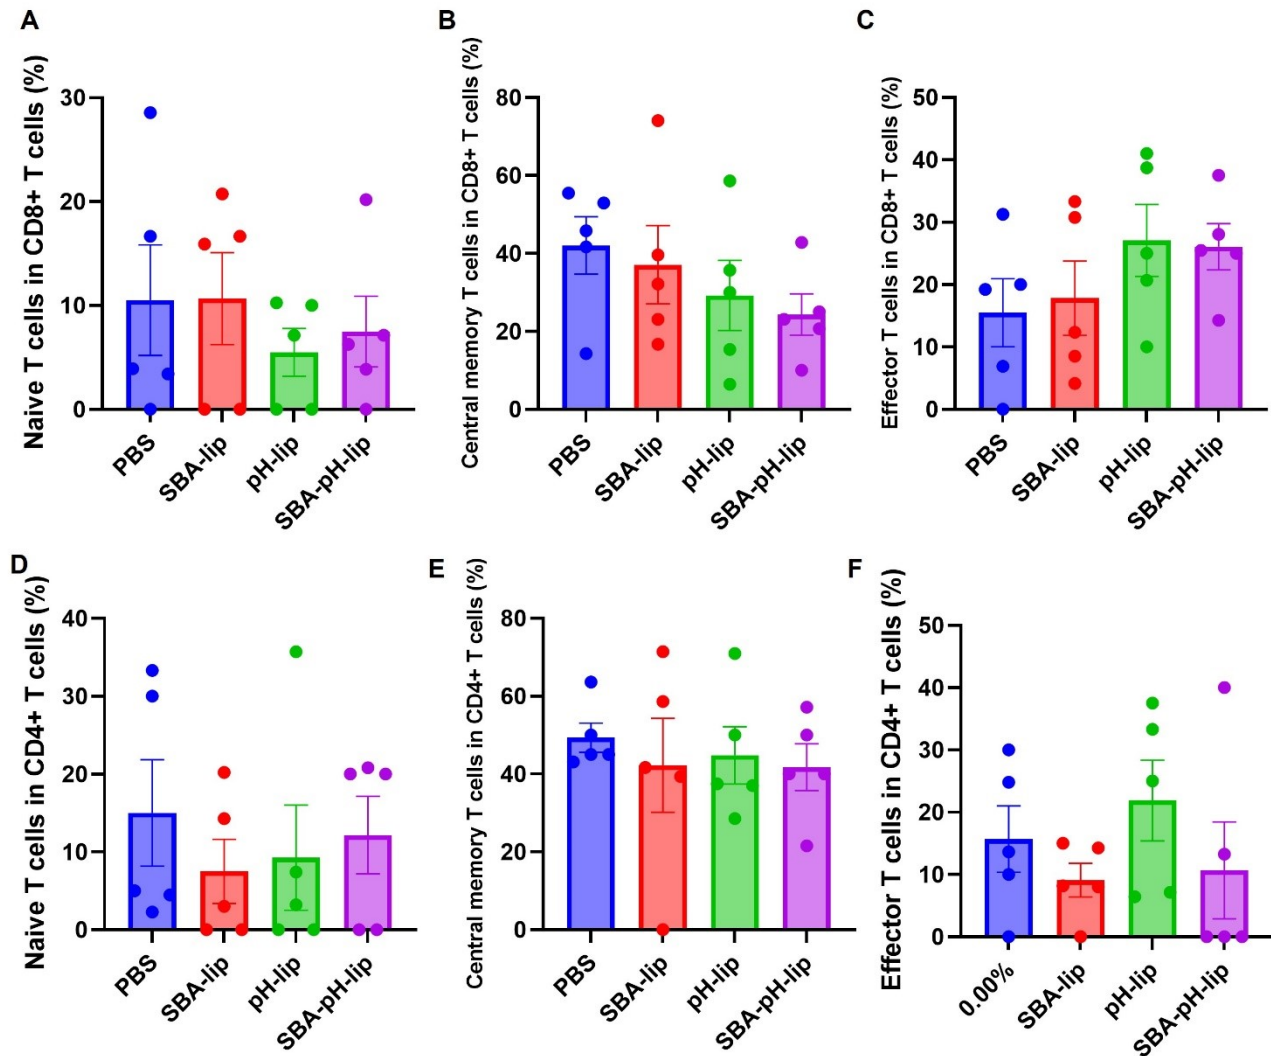

**Figure S10.** Effect of subcutaneous injection of liposomes on immune cell populations in the tumor. E.G7-OVA ( $5 \times 10^5$ /mouse) were subcutaneously inoculated into the left backs of C57BL/6 mice and tumor volume on day 0. Mice were subcutaneously injected 50 mg of OVA on day 7 with OVA-loaded liposomes. Single cells were extracted from the tumor on day 13, followed by flow cytometric analysis. Graphs depict the frequency of (A) naïve CD8+ T cells (CD62L+ CD44-) of CD3+ cells, (B) central memory CD8+ T cells (CD62L+ CD44+) of CD3+ cells, (C) effector memory CD8+ T cells (CD62L- CD44+) of CD3+ cells, (D) naïve CD4+ T cells (CD62L+ CD44-) of CD3+ cells, (E) central memory CD4+ T cells (CD62L+ CD44+) of CD3+ cells, (F) effector memory CD4+ T cells (CD62L- CD44+) of CD3+ cells. (mean  $\pm$  SEM;  $n = 5$ )
